# Supplementary material for: A cerium-based fluorescent nanosensor for highly specific detection of glutathione over cysteine and homocysteine
Source: Royal Society of Chemistry journal article supplement (doi:10.1039/d0an01740j), 2020-10-21
Supplement: d0an01740j1.pdf [file d0an01740j1.pdf]

## Electronic Supplementary Information

### **Cerium-based fluorescent nanosensor for high specific distinguishing of glutathione from cysteine and homocysteine**

*Tianlin Wang<sup>a,b</sup>, Zhanhui Tao<sup>b</sup>, Chi Qu<sup>b</sup>, Shuo Wang<sup>c</sup>, Yaqing Liu<sup>\*a, b</sup>*

<sup>a</sup> Beijing Advanced Innovation Center for Food Nutrition and Human Health, Beijing Technology and Business University, Beijing 100037, P. R. China

<sup>b</sup> State Key Laboratory of Food Nutrition and Safety, College of Food Engineering and Biotechnology, Tianjin University of Science and Technology, Tianjin 300457, P. R. China. Email: yaqingliu@tust.edu.cn

<sup>c</sup> Tianjin Key Laboratory of Food Science and Health, School of Medicine, Nankai University, Tianjin, 300071, P. R. China. Email: wangshuo@nankai.edu.cn.

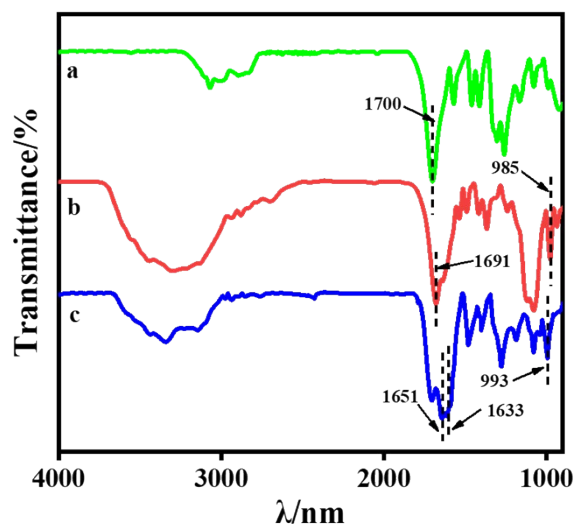

**Figure S1.** Fourier transfer infrared (FT-IR) spectra of DPA (curve a), GMP (curve b), and DPA-Ce-GMP (curve c).

Fourier transfer infrared (FT-IR) experiments of DPA (curve a), GMP (curve b) and DPA-Ce-GMP (curve c) were carried out to understand the assembling of DPA-Ce-GMP. The characteristic peak at  $1700\text{ cm}^{-1}$  in DPA spectra (curve a) was assigned to the stretching vibration of  $-\text{COOH}$  group, which becomes weak in DPA-Ce-GMP spectrum (curve c). The peak at  $1633\text{ cm}^{-1}$  in DPA-Ce-GMP spectra appeared are due to the nitrogen of pyridine that participates in the coordination with Ce.<sup>S1-S2</sup> The peaks at  $1691\text{ cm}^{-1}$  and  $985\text{ cm}^{-1}$  in GMP spectrum (curve b) are assigned to phosphate group and  $\text{C}=\text{O}$  stretching vibrations.<sup>S3</sup> Compared with the peaks of GMP, slight peak shifts (from  $1691\text{ cm}^{-1}$  to  $1651\text{ cm}^{-1}$  and from  $985\text{ cm}^{-1}$  to  $993\text{ cm}^{-1}$ ) suggests that both phosphate and carbonyl group were involved in the coordination with Ce.<sup>S4</sup>

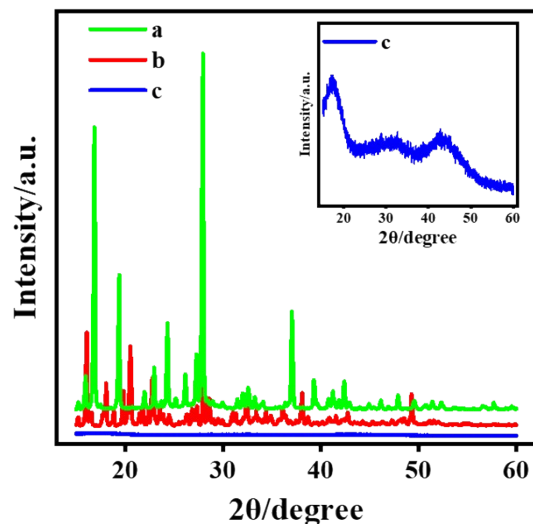

**Figure S2.** X-ray diffraction (XRD) spectra of DPA (a), GMP (b) and DPA-Ce-GMP

(c)

X-ray diffraction (XRD) patterns of DPA (curve a) and GMP (curve b) show their typical peaks with high intensity. After forming DPA-Ce-GMP, no strong diffraction peaks are detected (curve c) since the crystallinity of DPA and GMP is destroyed after coordinating with lanthanide ions <sup>S3</sup>.

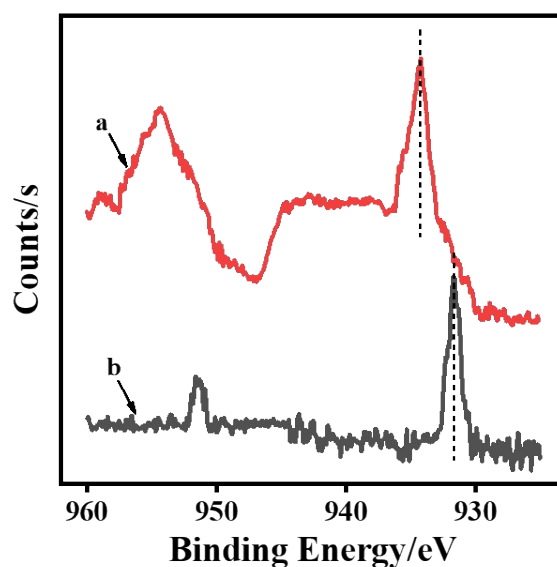

**Figure S3** XPS spectra of DPA-Ce-GMP+Cu<sup>2+</sup> (a), Cu-GSH (b), DPA-Ce-GMP +Cu-

GSH (b).

**Table S1.** Comparison of different methods for GSH determination.

| Method      | Sensors                                 | Linear range ( $\mu\text{M}$ ) | Detection limit (nM) | Reference |
|-------------|-----------------------------------------|--------------------------------|----------------------|-----------|
| Fluorimetry | BPMA-CQDs                               | 0.14-13.3                      | 42                   | S6        |
| Fluorimetry | DPP-NO <sub>2</sub>                     | -                              | 61.4                 | S7        |
| Fluorimetry | CDs-Br                                  | 0-34                           | 140                  | S8        |
| Fluorimetry | QDs-Cu( II )                            | -                              | 160                  | S9        |
| Colorimetry | Ag(I)-TMB                               | 0.05-8                         | 100                  | S10       |
| Colorimetry | MnO <sub>2</sub> -MB                    | 1-25                           | 300                  | S11       |
| Colorimetry | V <sub>2</sub> O <sub>5</sub> -TMB      | 0.01-0.5                       | 2.4                  | S12       |
| Colorimetry | CQDs-H <sub>2</sub> O <sub>2</sub> -TMB | 0.05-20                        | 16                   | S13       |
| Fluorimetry | DPA-Ce-GMP/Cu <sup>2+</sup>             | 0.01-40                        | 7.1                  | This work |

## References

- [S1] J. Zhao, S. Wang, S. Lu, J. Sun, X. Yang, *Nanoscale* 2018, 10, 7163-7170.
- [S2] X. Chen, Y. Wang, R. Chai, Y. Xu, H. Li, B. Liu, *ACS Appl. Mater. Interfaces* 2017, 9, 13554-13563.
- [S3] N. Gao, Y. Zhang, P. Huang, Z. Xiang, F. Y. Wu, L. Q. Mao, *Anal. Chem.* 2018, 90, 7004-7011.
- [S4] F. Wang, X. Hu, J. Hu, Q. Peng, B. Zheng, J. Du, D. Xiao, *J. Mater. Chem. B* 2018, 6, 6008-6015.
- [S5] J. Sun, B. Wang, X. Zhao, Z. Jun. Li, X. R. Yang, *Anal. Chem.* 2016, 88, 1355-

1361.

[S6] Y. Huang, J. Zhou, H. Feng, J. Zheng, H. M. Ma, W. Liu, C. Tang, H. Ao, M.

Zhao, Z. Qian, *Biosens. Bioelectron.* 2016, 86, 748-755.

[S7] L. Wang, X. Chen, D. Cao, *Sens. Actuators, B* 2017, 244, 531-540.1

[S8] F. Yan, Q. Ye, J. Xu, J. He, L. Chen, X. Zhou, *Sens. Actuators, B* 2017, 251,

753-762.

[S9] Y. Hu, C. H. Heo, G. Kim, E. J. Jun, J. Yin, H. M. Kim, J. Yoon, *Anal. Chem.*

2015, 87, 3308-3313.

[S10] P. Ni, Y. Sun, H. Dai, J. Hu, S. Jiang, Y. Wang, Z. Li, *Biosens. Bioelectron.*

2015, 63, 47-52.

[S11] J. Liu, L. Meng, Z. Fei, P. J. Dyson, X. Jing, X. Liu, *Biosens. Bioelectron.* 2017,

90, 69-74.

[S12] A. B. Ganganboina, R. A. Doong, *Sens. Actuators, B* 2018, 273, 1179-1186.

[S13] Q. Zhong, Y. Chen, A. Su, Y. Wang, *Sens. Actuators, B* 2018, 273, 1098-1102.
